# Supplementary material
Source: PubMed Central journal article supplement (PMC7758704)
Supplement: sj-pdf-1-vdi-10.1177_1040638720974745.pdf [file sj-pdf-1-vdi-10.1177_1040638720974745.pdf]

Rossi G, et al. Preanalytical variables affecting the measurement of serum paraoxonase-1 activity in horses

**Supplementary Table 1.** Intra- and inter-assay precision of paraoxonase-1 (PON-1) activity measured using paraoxon-ethyl and p-nitrophenyl acetate as substrate.

| Pool        | Paraoxon-ethyl |        |      | p-nitrophenyl acetate |        |       |
|-------------|----------------|--------|------|-----------------------|--------|-------|
|             | High           | Medium | Low  | High                  | Medium | Low   |
| Intra-assay |                |        |      |                       |        |       |
| Mean (U/L)  | 131.8          | 91.2   | 66.7 | 1,908                 | 1,429  | 1,019 |
| SD (U/L)    | 1.4            | 0.4    | 0.5  | 13                    | 11     | 100   |
| CV (%)      | 1.1            | 0.4    | 0.7  | 0.7                   | 0.7    | 9.8   |
| Inter-assay |                |        |      |                       |        |       |
| Mean (U/L)  | ND             | 108.9  | 64.1 | ND                    | 1,496  | 1,215 |
| SD (U/L)    |                | 4.1    | 5.6  |                       | 89     | 93    |
| CV (%)      |                | 3.7    | 8.7  |                       | 5.9    | 7.7   |

CV = coefficient of variation; ND = not determined; SD = standard deviation.

**Supplementary Table 2.** PON-1 activity measured in an equine serum pool sequentially diluted to assess the accuracy by the linearity under dilution (LUD) test.

| LUD  | Paraoxon-ethyl                |                               |            | p-nitrophenyl acetate         |                               |            |
|------|-------------------------------|-------------------------------|------------|-------------------------------|-------------------------------|------------|
|      | Observed PON-1 activity (U/L) | Expected PON-1 activity (U/L) | % Recovery | Observed PON-1 activity (U/L) | Expected PON-1 activity (U/L) | % Recovery |
| 100% | 66.8                          | 66.8                          | 0.0        | 1,174                         | 1,174                         | 0.0        |
| 90%  | 60.9                          | 60.0                          | -1.4       | 1,036                         | 1,056                         | 1.9        |
| 80%  | 51.0                          | 53.4                          | 4.4        | 862                           | 939                           | 8.2        |
| 70%  | 44.3                          | 46.7                          | 5.2        | 778                           | 822                           | 5.3        |
| 60%  | 41.5                          | 40.0                          | -3.8       | 690                           | 704                           | 2.1        |
| 50%  | 34.0                          | 33.4                          | -1.8       | 480                           | 587                           | 18.1       |
| 40%  | 28.9                          | 26.7                          | -8.3       | 419                           | 469                           | 10.7       |
| 30%  | 20.9                          | 20.0                          | -4.5       | 341                           | 352                           | 3.1        |
| 20%  | 16.0                          | 13.3                          | -19.6      | 263                           | 235                           | 12.1       |
| 10%  | 10.3                          | 6.7                           | -54.3      | 94                            | 117                           | 20.3       |
| Mean |                               |                               | -8.4       |                               |                               | 8.2        |

% Recovery = measured concentration/expected concentration × 100%.

**Supplementary Table 3.** PON-1 activity measured in an equine serum pool with low PON-1 activity spiked with another pool with high PON-1 activity to assess the accuracy by the spiking recovery test (SRT).

| SRT  | Paraoxon-ethyl                |                               |            | p-nitrophenyl acetate         |                               |            |
|------|-------------------------------|-------------------------------|------------|-------------------------------|-------------------------------|------------|
|      | Observed PON-1 activity (U/L) | Expected PON-1 activity (U/L) | % Recovery | Observed PON-1 activity (U/L) | Expected PON-1 activity (U/L) | % Recovery |
| 0%   | 30.8                          | 30.8                          | 0.0        | 825                           | 825                           | 0.0        |
| 10%  | 34.5                          | 36.0                          | 4.2        | 856                           | 86                            | 2.3        |
| 20%  | 44.3                          | 41.28                         | -7.2       | 917                           | 927                           | 1.1        |
| 30%  | 54.4                          | 46.52                         | -16.8      | 965                           | 977                           | 1.3        |
| 40%  | 59.4                          | 51.76                         | -14.8      | 1,024                         | 1,028                         | 0.4        |
| 50%  | 64.3                          | 57                            | -12.8      | 1,072                         | 1,078                         | 0.6        |
| 60%  | 69.1                          | 62.24                         | -11.1      | 1,125                         | 1,129                         | 0.3        |
| 70%  | 75.1                          | 67.48                         | -11.2      | 1,182                         | 1,179                         | -0.2       |
| 80%  | 79.0                          | 72.72                         | -8.6       | 1,212                         | 1,230                         | 1.5        |
| 90%  | 83.2                          | 83.2                          | 0.0        | 1,279                         | 1,281                         | 0.1        |
| Mean |                               |                               | -7.8       |                               |                               | 0.7        |

% Recovery = measured concentration/expected concentration × 100%.

**Supplementary Table 4.** Results of PON-1 activity in equine serum samples collected monthly and assessed using 2 different substrates.

| Month     | Paraoxon-ethyl |                             |                                                                                                                                                                                        | 4-nitrophenyl acetate |                             |                                                                                                                                                                                                                       |
|-----------|----------------|-----------------------------|----------------------------------------------------------------------------------------------------------------------------------------------------------------------------------------|-----------------------|-----------------------------|-----------------------------------------------------------------------------------------------------------------------------------------------------------------------------------------------------------------------|
|           | <i>n</i>       | PON-1 activity (U/L median) | <i>p</i> value                                                                                                                                                                         | <i>n</i>              | PON-1 activity (U/L median) | <i>p</i> value                                                                                                                                                                                                        |
| January   | 35             | 71.1 (49.0–125.0)           | Jan vs Feb <i>p</i> = 0.003<br>Jan vs May <i>p</i> = 0.001<br>Jan vs Jun <i>p</i> = 0.003<br>Jan vs Aug <i>p</i> = 0.010<br>Jan vs Sep <i>p</i> = 0.000<br>Jan vs Oct <i>p</i> = 0.019 | 34                    | 1,193 (676–1,538)           | Jan vs Feb <i>p</i> = 0.003<br>Jan vs May <i>p</i> = 0.001<br>Jan vs Jun <i>p</i> = 0.003<br>Jan vs Jul <i>p</i> = 0.019<br>Jan vs Aug <i>p</i> = 0.010<br>Jan vs Sep <i>p</i> = 0.000<br>Jan vs Oct <i>p</i> = 0.019 |
| February  | 35             | 70.3 (50.4–110.7)           | Feb vs Apr <i>p</i> = 0.006<br>Feb vs Nov <i>p</i> = 0.000                                                                                                                             | 34                    | 1,314 (1,107–3,190)         | Feb vs Apr <i>p</i> = 0.006<br>Feb vs Nov <i>p</i> = 0.000                                                                                                                                                            |
| April     | 35             | 76.9 (58.2–133.8)           | Apr vs May <i>p</i> = 0.000<br>Apr vs Jun <i>p</i> = 0.001<br>Apr vs Jul <i>p</i> = 0.003<br>Apr vs Aug <i>p</i> = 0.001<br>Apr vs Sep <i>p</i> = 0.011<br>Apr vs Oct <i>p</i> = 0.017 | 34                    | 1,223 (890–2,036)           | Apr vs May <i>p</i> = 0.000<br>Apr vs Jun <i>p</i> = 0.001<br>Apr vs Jul <i>p</i> = 0.003<br>Apr vs Aug <i>p</i> = 0.001<br>Apr vs Sep <i>p</i> = 0.011<br>Apr vs Oct <i>p</i> = 0.017                                |
| May       | 35             | 86.4 (53.0–137.5)           | May vs Jun <i>p</i> = 0.003<br>May vs Jul <i>p</i> = 0.000<br>May vs Aug <i>p</i> = 0.006<br>May vs Oct <i>p</i> = 0.008<br>May vs Nov <i>p</i> = 0.000<br>May vs Dec <i>p</i> = 0.000 | 34                    | 1,310 (978–3,296)           | May vs Jun <i>p</i> = 0.003<br>May vs Jul <i>p</i> = 0.000<br>May vs Aug <i>p</i> = 0.006<br>May vs Oct <i>p</i> = 0.008<br>May vs Nov <i>p</i> = 0.000<br>May vs Dec <i>p</i> = 0.000                                |
| June      | 35             | 87.0 (56.8–132.4)           | Jun vs Nov <i>p</i> = 0.000<br>Jun vs Dec <i>p</i> = 0.024                                                                                                                             | 34                    | 1,287 (1,047–1,685)         | Jun vs Sep <i>p</i> = 0.045<br>Jun vs Nov <i>p</i> = 0.000<br>Jun vs Dec <i>p</i> = 0.024                                                                                                                             |
| July      | 35             | 80.4 (51.4–121.0)           | Jul vs Sep <i>p</i> = 0.007<br>Jul vs Nov <i>p</i> = 0.000                                                                                                                             | 34                    | 1,260 (1,016–1,678)         | Jul vs Sep <i>p</i> = 0.007<br>Jul vs Nov <i>p</i> = 0.000                                                                                                                                                            |
| August    | 35             | 85.5 (60.8–133.5)           | Aug vs Nov <i>p</i> = 0.000<br>Aug vs Dec <i>p</i> = 0.001                                                                                                                             | 34                    | 1,283 (1,057–2,327)         | Aug vs Nov <i>p</i> = 0.000<br>Aug vs Dec <i>p</i> = 0.001                                                                                                                                                            |
| September | 35             | 83.8 (53.3–144.5)           | Sep vs Nov <i>p</i> = 0.000<br>Sep vs Dec <i>p</i> = 0.020                                                                                                                             | 34                    | 1,305 (212–2,126)           | Sep vs Nov <i>p</i> = 0.000<br>Sep vs Dec <i>p</i> = 0.020                                                                                                                                                            |
| October   | 35             | 75.1 (46.6–122.9)           | Oct vs Nov <i>p</i> = 0.000                                                                                                                                                            | 34                    | 1,224 (902–2,060)           | Oct vs Nov <i>p</i> = 0.000                                                                                                                                                                                           |
| November  | 35             | 80.5 (48.5–129.3)           | Nov vs Dec <i>p</i> = 0.003                                                                                                                                                            | 34                    | 1,202 (833–1,508)           | Nov vs Dec <i>p</i> = 0.003                                                                                                                                                                                           |

Minimum–maximum in parentheses.

Preanalytical variables of equine PON-1 measurement

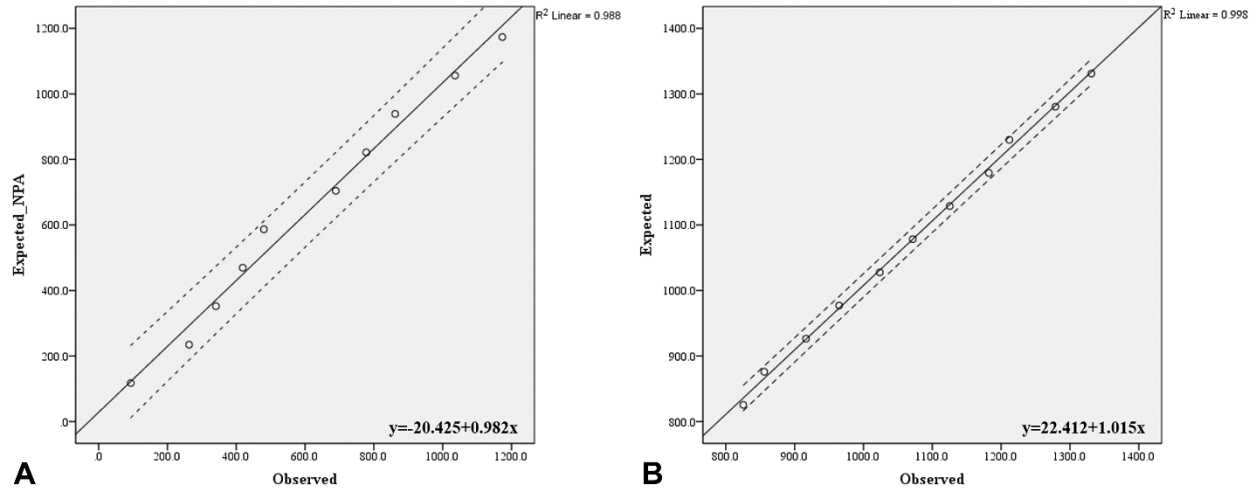

**Supplementary Figure 1. A.** Linearity under dilution (LUD) and **B.** spiking recovery test (SRT) of PON-1 activity using p-nitrophenyl acetate as substrate. Each data point indicates the mean of a triplicate measurement. The solid line indicates the linear correlation between the expect and observed values, dashed lines indicate the 95% CI.

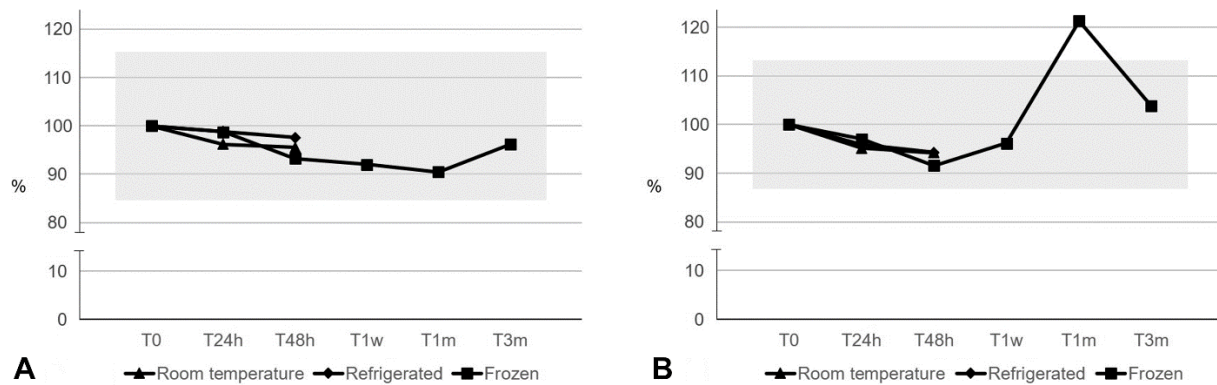

**Supplementary Figure 2.** Changes of PON-1 activity, expressed as percentages, in equine serum samples stored under different conditions. **A.** PON-1 activity assessed using paraoxon-ethyl as substrate. **B.** PON-1 activity assessed using 4-nitrophenyl acetate. The gray areas are the total observed error for each method.

### Preanalytical variables of equine PON-1 measurement

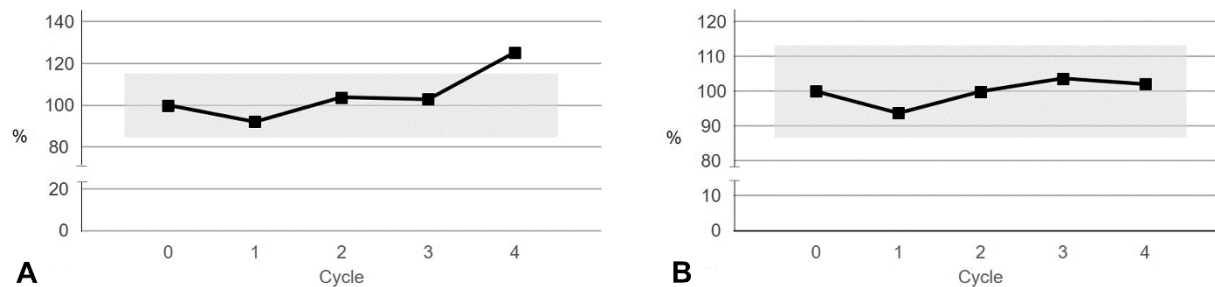

**Supplementary Figure 3.** Changes of PON-1 activity, expressed as percentages, in equine serum samples during repeated freeze–thaw cycles. **A.** PON-1 activity assessed using paraoxon-ethyl as substrate. **B.** PON-1 activity assessed using 4-nitrophenyl acetate. The gray areas are the total observed error for each method.
